# Supplementary material for: Quinoidal oligoquinoline: a novel quinodimethane exhibiting high electroluminescence efficiency and p-channel field effect charge transport
Source: Royal Society of Chemistry journal article supplement (doi:10.1039/b509322h), 2005-01-01
Supplement: b509322h.pdf [file b509322h.pdf]

**Quinoidal Oligoquinoline: A Novel Quinodimethane Exhibiting High  
Electroluminescence Efficiency and p-Channel Field Effect Charge Transport**

*Christopher J. Tonzola, Jessica M. Hancock, Amit Babel and Samson A. Jenekhe*

Department of Chemical Engineering and Department of Chemistry, University of  
Washington, Seattle, Washington 98195-1750, U. S. A.

**Single Crystal Structure.** Single crystals of **5** suitable for the determination of X-ray crystal structure were grown by slow evaporation of CHCl<sub>3</sub>/methanol solution. **5** was obtained as white needles and was found to have a monoclinic crystal with unit cell parameters:  $a = 17.7390(7)$  Å,  $b = 5.9890(2)$  Å,  $c = 25.1160(10)$  Å, and  $\beta = 120.6770(16)$ . The space group was P c. The structure was refined to a final residual of  $R_1 = 6.77\%$ .

**Materials.** All reagents were purchased from Aldrich and used as received.

**6,6'-Bis(2-(diphenylmethylene)-4-phenylquinoline) (5).** 0.507 g (2.42 mmol) of 1,1-diphenylacetone (**3**), 0.475 g (1.21 mmol) of 3,3'-dibenzoylbenzidine (**4**), 3 g of diphenylphosphate, and 5 mL toluene were added to a dry reaction flask. The flask was purged with argon for 20 minutes and the temperature was gradually raised to 120 °C and stirred for 24 hr. The reaction mixture was precipitated into 10% triethylamine/ethanol and collected by vacuum filtration.<sup>10</sup> The precipitate was passed through silica gel column via flash chromatography to remove impurities. The resulting product was then recrystallized twice from tetrahydrofuran/methanol solutions. 0.725 g (81 %) of **5** was recovered as white needles. <sup>1</sup>H-NMR (CDCl<sub>3</sub>):  $\delta$  ppm = 8.22 (d, 2H), 8.11 (s, 2H), 8.04

(d, 2H), 7.99 (s, 2H), 7.48 (m, 10H), 7.43 (m, 20H), 5.89 (s, 2H). HRMS (FAB) calcd for  $C_{56}H_{40}N_2$  740.9566, found 740.9562.

**6,6'-Bis(2-(diphenylmethylene)-4-phenylquinoline) (6, BQPQ).** 1.45 g (1.96 mmol) of **5** and 0.56 g (2.5 mmol) 2,3-dichloro-5,6-dicyano-1,4-benzoquinone were refluxed in anhydrous acetonitrile under argon for 2 h. The resulting solid was collected by filtration, dried, and chromatographed in silica gel with  $CH_2Cl_2$ . Products were then recrystallized twice from  $CHCl_3/MeOH$  mixtures. 0.745 g (52 %) was recovered as a yellow solid.  $^1H$ -NMR ( $CDCl_3$ ):  $\delta$  ppm = 8.76 (d, 2H), 8.59 (s, 2H), 8.09 (d, 2H), 7.91 (s, 2H), 7.71 (m, 10H), 7.50 (m, 20H). HRMS (FAB) calcd for  $C_{56}H_{38}N_2$  738.9407, found 738.9405.

**General.**  $^1H$  NMR and  $^{13}C$ -NMR spectra were recorded on a Bruker DRX-499 at 499 MHz using  $CDCl_3$  as the solvent. Fourier transformation infrared (FT-IR) spectroscopy was done as a film on a KBr plate using a Perkin-Elmer 1720 FT-IT spectrometer. Thermogravimetric analysis of the molecules was conducted on a TA Instruments Q50 TGA. A heating rate of 10 °C/min under flowing  $N_2$  was used with runs being conducted from room temperature to 600 °C.

**Photophysics.** Optical absorption spectra were obtained by using a Lambda-900 UV/vis/near-IR spectrophotometer (Perkin-Elmer). Photoluminescence spectra were carried out on a PTI QuantaMaster model QM-2001-4 spectrofluorometer (Photon Technology International Inc. Ontario, Canada). To measure the PL quantum yields ( $\phi_f$ ), oligoquinoline solutions in spectral grade toluene were prepared. The concentration ( $\sim 10^{-6}$  M) was adjusted so that the absorbance of the solution was lower than 0.1. A  $5 \times 10^{-6}$  M solution of 9,10-diphenylanthracene in toluene was used as a standard ( $\phi_f = 0.93$ ). All the

solutions were degassed with high-purity nitrogen for at least 20 min before spectral acquisition.

**Cyclic Voltammetry.** Cyclic voltammetry experiments were done on an EG&G Princeton Applied Research Potentiostat/Galvanostat (Model 273A). Data were collected and analyzed by the Model 270 Electrochemical Analysis System Software on a PC computer. A three-electrode cell was used in all experiments as previously described.<sup>11</sup> Platinum wire electrodes were used as both counter and working electrodes and silver/silver ion (Ag in 0.1 M AgNO<sub>3</sub> solution, Bioanalytical System, Inc.) was used as a reference electrode. Ferrocene/ferrocenium (Fc/Fc<sup>+</sup>) redox couple was used as an internal standard and the potential values, thus, obtained in reference to Ag/Ag<sup>+</sup> electrode were converted to the saturated calomel electrode (SCE) scale. Solution cyclic voltammetry was carried out on a millimolar solution of BQPQ in DMF solvent containing TBAPF<sub>6</sub> (0.1 M) as an electrolyte. The solution in the three-electrode cell was purged with ultrahigh-purity N<sub>2</sub> for 10-15 minutes before each experiment and a blanket of N<sub>2</sub> was used during the experiment.

**Fabrication and Characterization of OLEDs.** The OLEDs were fabricated using BQPQ as an emissive material. Indium-tin oxide (ITO)-coated glass substrates (Delta Technologies Ltd., Stillwater, MN) were cleaned sequentially in ultrasonic baths of 2-propanol/deionized water (1:1 volume) mixture, toluene, deionized water, and acetone, then dried at 60 °C in vacuum overnight. A ~1wt% poly(ethylenedioxythiophene)/poly(styrene sulfonate) blend (PEDOT) dispersion in water was filtered through a 0.45 μm PVDF syringe filter. A 40 nm thick layer was then spin cast onto the ITO-coated glass to act as a hole injection layer and dried at 200 °C for 15 minutes under vacuum. A

20nm thick poly(N-vinylcarbazole) (PVK) hole-transport/electron-blocking layer was spin coated from a 1 wt% toluene solution onto the PEDOT layer and dried at 60 °C for 4 hour under vacuum. Films (35-45 nm) of BQPQ were evaporated from resistively heated quartz crucibles at a rate of 0.2–0.3 nm/s in a vacuum evaporator (Edwards Auto 306) at a base pressure of  $<3 \times 10^{-6}$  Torr onto the PVK layer. The chamber was vented with air to load the cathode materials, pumped down to  $\sim 3 \times 10^{-6}$  Torr, and a 2 nm thick lithium fluoride layer followed by a 120nm thick aluminum layer were deposited through a shadow mask to form active diode areas of 0.2 cm<sup>2</sup>. The film thicknesses were measured by an Alpha-Step 500 surface profiler (KLA Tencor, Mountain View, CA). Electroluminescence spectra were obtained using a PTI QM-2001-4 spectrofluorimeter. Current-voltage characteristics of the LEDs were measured using a HP4155A semiconductor parameter analyzer (Yokogawa Hewlett-Packard, Tokyo). The luminance was simultaneously measured using a model 370 optometer (UDT instruments, Baltimore, MD) equipped with a calibrated luminance sensor head (model 211) and a 5x objective lens. The device external quantum efficiency was calculated using procedures reported previously.<sup>14</sup> All the device fabrication and characterization steps were done under ambient laboratory conditions.

**Fabrication and Characterization of Thin Film Transistors.** The thin film field-effect transistors were fabricated by using a bottom contact geometry. Heavily doped Si with a conductivity of 10<sup>3</sup> S/cm was used as the gate electrode with a 300 nm thick SiO<sub>2</sub> layer as the gate dielectric. By means of photolithography and vacuum sputtering ( $2 \times 10^{-6}$  Torr), two 90 nm thick gold electrodes (source and drain) with 10 nm thick Ti-W alloy adhesive layer were fabricated onto the SiO<sub>2</sub>/Si substrates. A channel length (*L*) of 25 μm and a

channel width ( $W$ ) of 500  $\mu\text{m}$  were used. A gold contact pad was also deposited on the gate electrode to make ohmic contact. Electrical characteristics of the devices were measured using a Keithley 4200 semiconductor parameter analyzer (Keithley Instruments, Inc., Cleveland, OH). All fabrication and measurements were done under ambient laboratory conditions.

**Surface Treatment of SiO<sub>2</sub> and Thin Film Deposition.** SiO<sub>2</sub> surface was treated with hexamethyldisilazane vapor at 150°C for 5 min. The SiO<sub>2</sub> surface was characterized before and after modification by measuring the advancing contact angle of a water drop on the SiO<sub>2</sub> surface. Before treatment, the contact angle was around 10-15°, indicating a hydrophilic surface. After treatment with HMDS the water contact angle increased to 50°. The thin-films of BQPQ were deposited by vacuum evaporation ( $<10^{-6}$  torr).

**Table S1** Electroluminescent Properties of BQPQ OLEDs.

| Device Structure <sup>a</sup> | V <sub>on</sub> <sup>b</sup><br>(V) | Drive<br>Voltage<br>(V) | J <sub>max</sub> <sup>c</sup><br>(mA/m <sup>2</sup> ) | L <sub>max</sub> <sup>d</sup><br>(cd/m <sup>2</sup> ) | LE <sub>max</sub><br>(@ L)<br>(cd/A) | EL<br>λ <sub>max</sub> | CIE 1931<br>x,y |
|-------------------------------|-------------------------------------|-------------------------|-------------------------------------------------------|-------------------------------------------------------|--------------------------------------|------------------------|-----------------|
| I BQPQ                        | 2.2                                 | 5.3                     | 234                                                   | 180                                                   | 0.1<br>(135)                         | 512                    | 0.27, 0.57      |
| II BQPQ/TPBI                  | 2.3                                 | 8                       | 500                                                   | 6030                                                  | 5.0<br>(160)                         | 507                    | 0.25, 0.60      |
| III PEDOT/PVK/BQPQ            | 3.5                                 | 11                      | 202                                                   | 1615                                                  | 1.1<br>(804)                         | 512                    | 0.28, 0.59      |
| IV PEDOT/PVK/BQPQ/TPBI        | 3.5                                 | 13.7                    | 500                                                   | 16265                                                 | 5.9<br>(2035)                        | 510                    | 0.30, 0.58      |

<sup>a</sup>All devices used ITO as the anode and LiF/Al as the cathode. <sup>b</sup>Turn-on voltage (at which EL is visible to the eye). <sup>c</sup>Current Density. <sup>d</sup>Luminance.

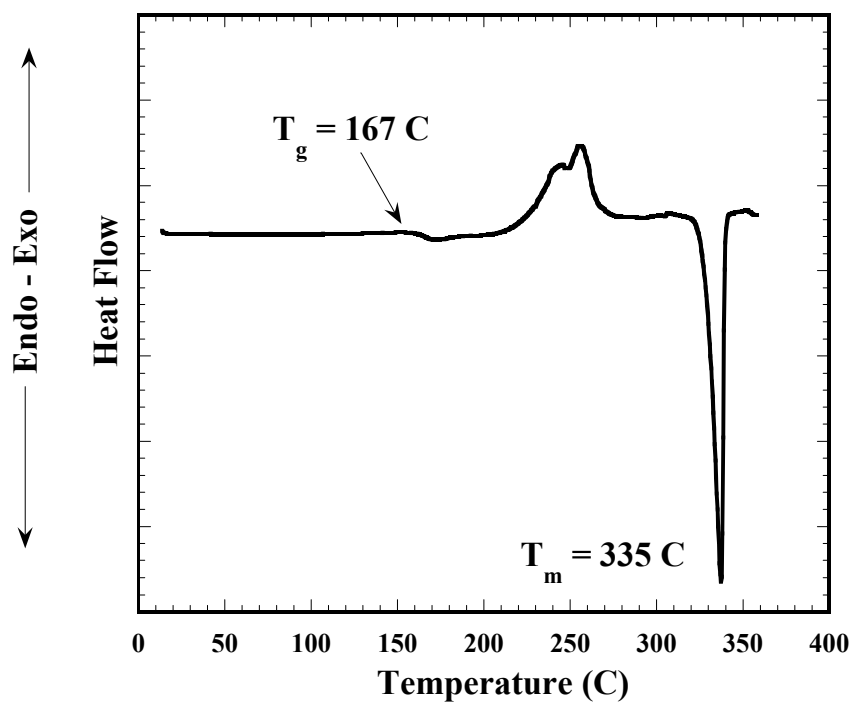

**Figure S1** Second heating DSC scan of BQPQ at a heating rate of 10 °C/min in nitrogen.

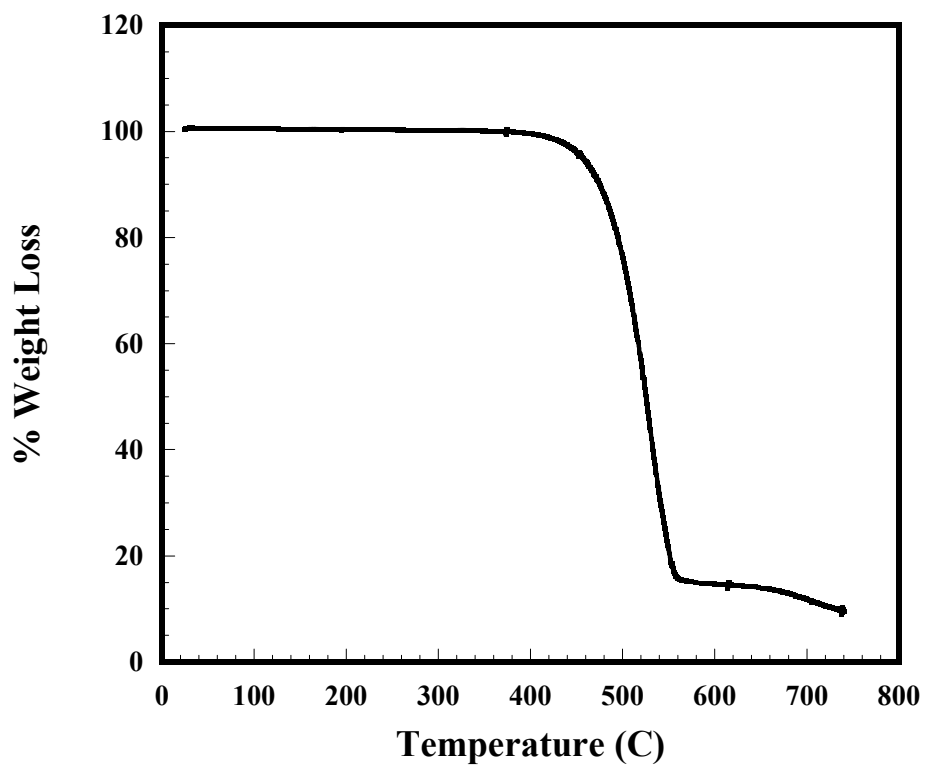

**Figure S2** TGA scan of BQPQ at a heating rate of 10 °C/min in nitrogen.



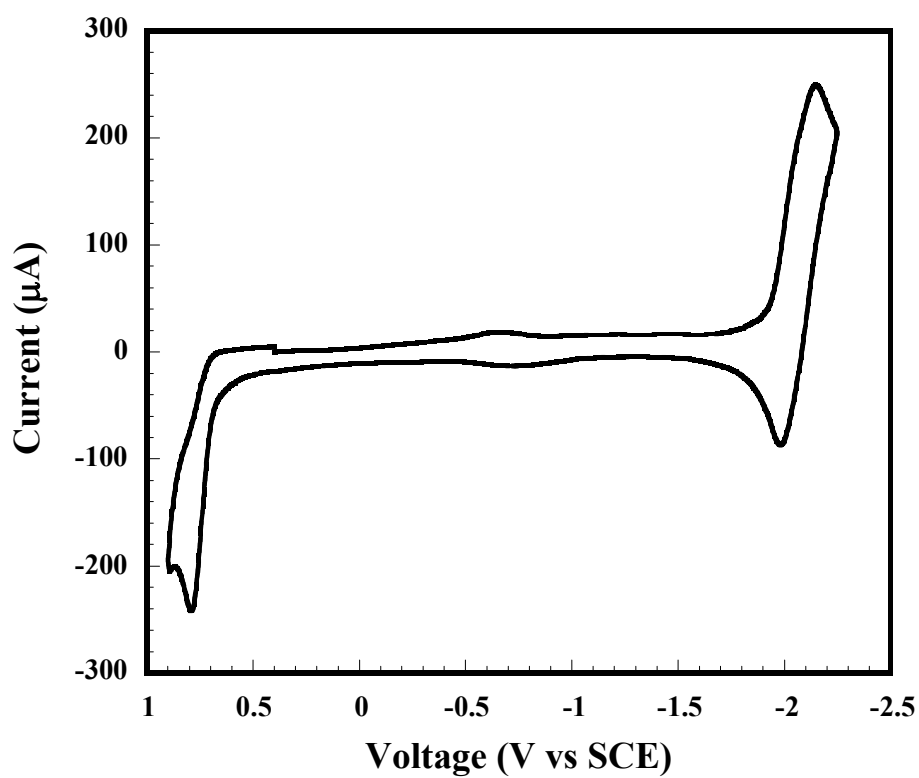

**Fig. S3** Cyclic voltammogram of BQPQ in 0.1M in DMF/0.1 M TBAPF<sub>6</sub> MeCN.

Scan rate = 300 mV/sec.

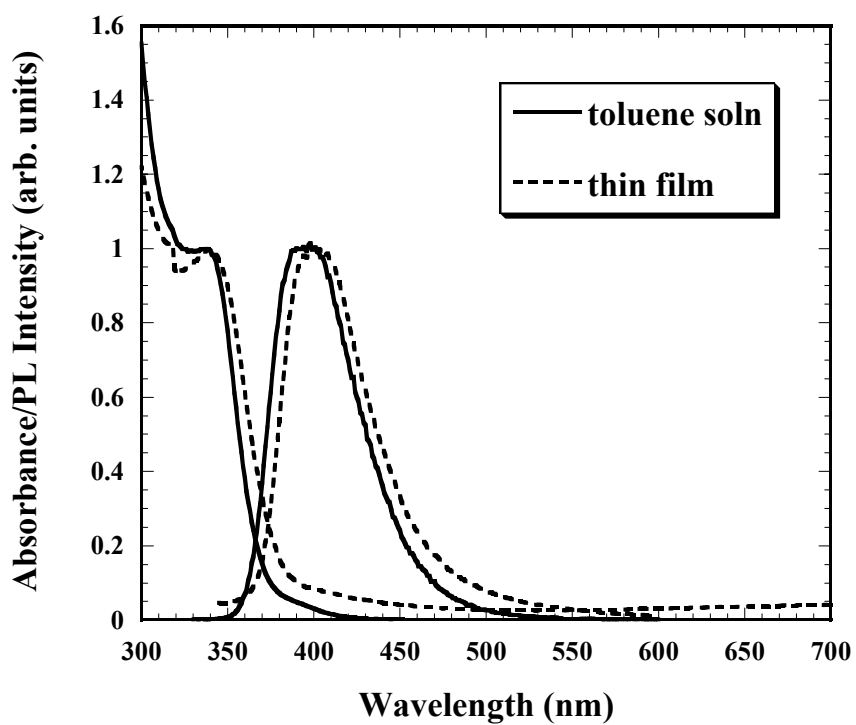

**Fig S4** Absorption and photoluminescence (PL) spectra of **5** in  $10^{-6}$  M toluene solution and as a thin film.

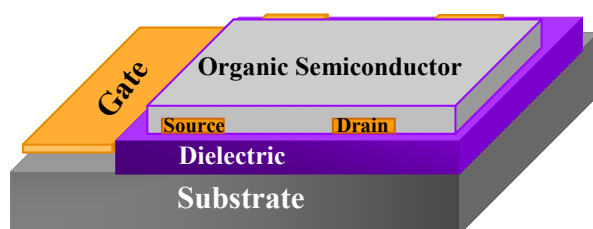

**Figure S5** Device schematic of a bottom contact organic field-effect transistor (OFET).
